# Supplementary material for: ANALISIS DAN PERANCANGAN APLIKASI CONVERTER "SERVER MULTICAST" MENJADI "SERVER UNICAST" DAN SEBALIKNYA
Source: Royal Society of Chemistry journal article supplement (doi:10.1039/d2cp05066h), 2009-01-01
Supplement: d2cp05066h1.pdf [file d2cp05066h1.pdf]

## Supplementary Information

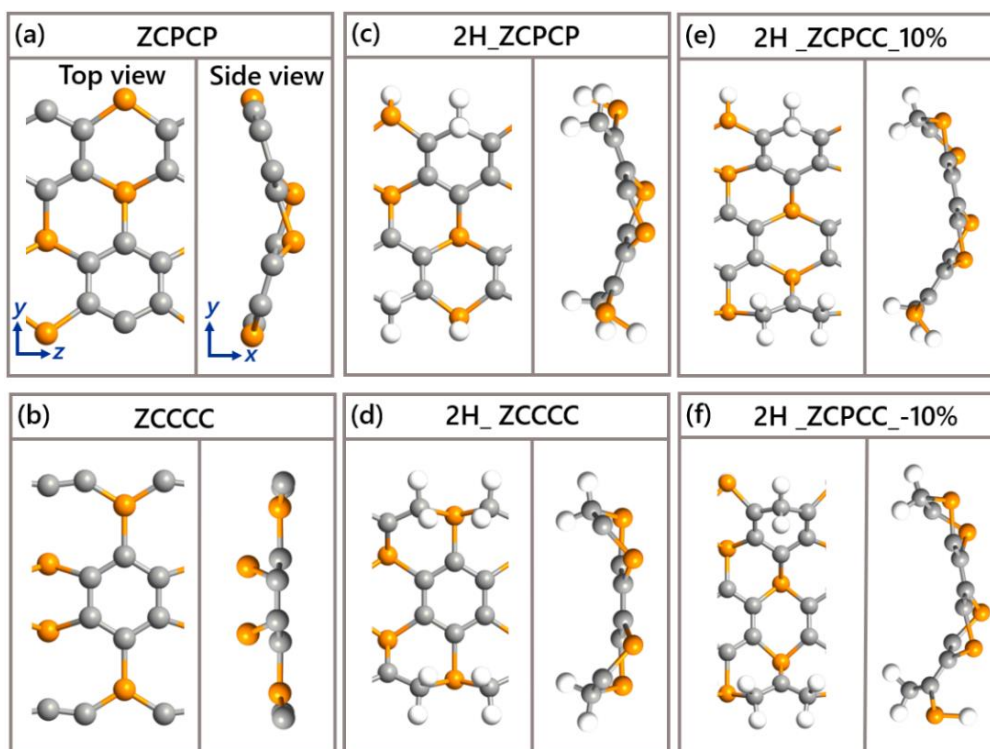

**Figure S1.** (a)-(b) Top and side views of ZCPCP and ZCCCC. (c)-(d) Optimized structures of ZCPCP and ZCCCC saturated with dihydrogen. (e)-(f) Optimized structures of ZCPCP saturated with dihydrogen at 10% tensile and -10% compressive strain.

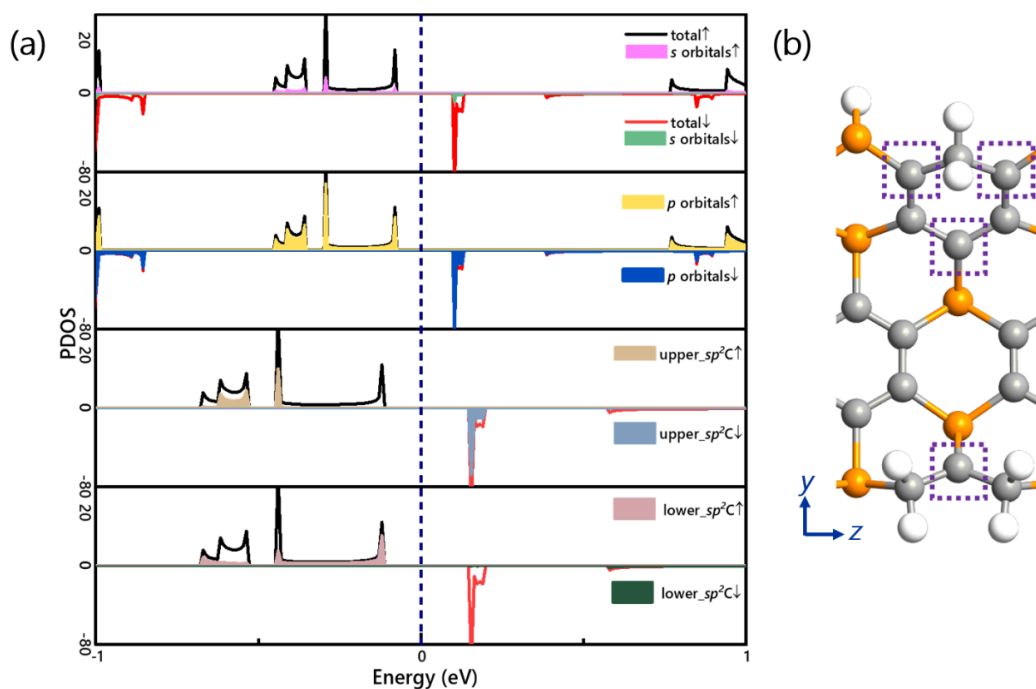

**Figure S2.** (a) The density of states (DOS) of the PC<sub>3</sub>NRs system and the projected density of states (PDOS) of *s* orbitals, *p* orbitals, and C atoms with *sp*<sup>2</sup> hybridization located at the upper and lower edges. (b) Projected atoms are marked with purple rectangles. Up and down arrows indicate spin-up and down.

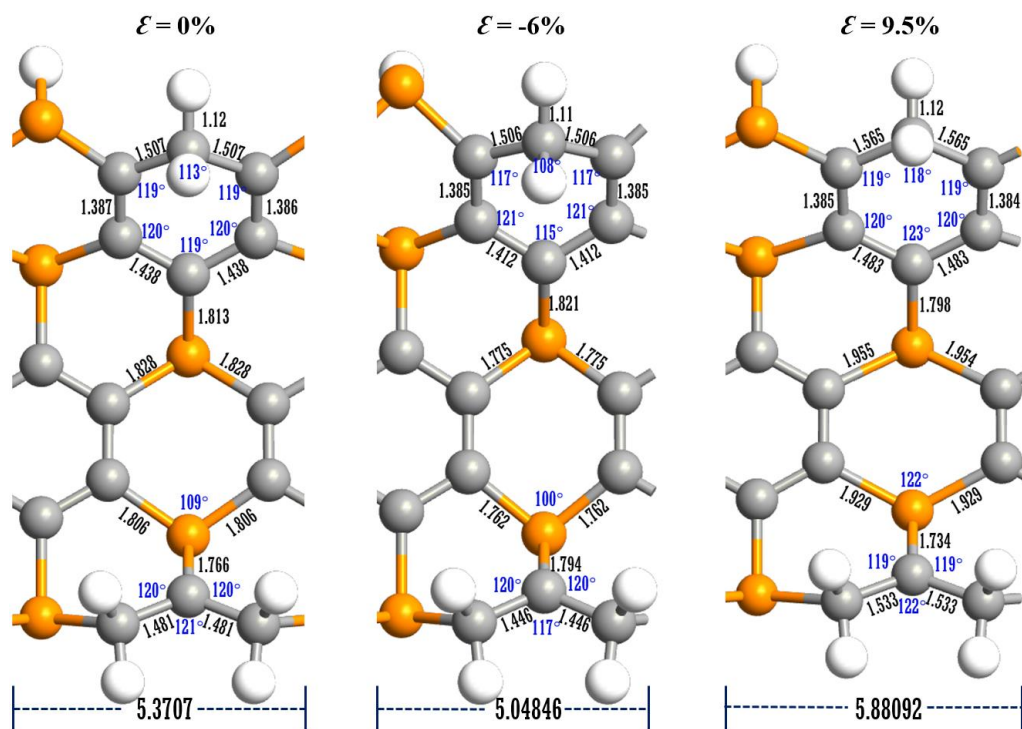

**Figure S3.** Bond lengths, bond angles and lattice constants of PC<sub>3</sub>NRs at no strain, -6% compressive strain and 9.5% tensile strain. Length is expressed in Å.

**Table S1.** The energy differences between the FM and AFM states

| $\varepsilon$ | (eV/atom) |          |            |
|---------------|-----------|----------|------------|
|               | FM        | AFM      | $\Delta E$ |
| -10%          | -6.96640  | -6.96635 | -0.00005   |
| -9%           | -6.99429  | -6.99433 | 0.00004    |
| -7%           | -7.04207  | -7.04211 | 0.00004    |
| -6%           | -7.06139  | -7.06150 | 0.00011    |
| -5%           | -7.07028  | -7.07835 | 0.00807    |
| -3%           | -7.10306  | -7.10330 | 0.00024    |
| 0%            | -7.12036  | -7.12044 | 0.00008    |
| 3%            | -7.11481  | -7.11525 | 0.00044    |
| 5%            | -7.09944  | -7.10018 | 0.00074    |
| 7%            | -7.07556  | -7.07682 | 0.00126    |
| 9%            | -7.04472  | -7.04682 | 0.00210    |
| 9.5%          | -7.03618  | -7.03861 | 0.00243    |
| 10%           | -7.02728  | -7.02985 | 0.00257    |

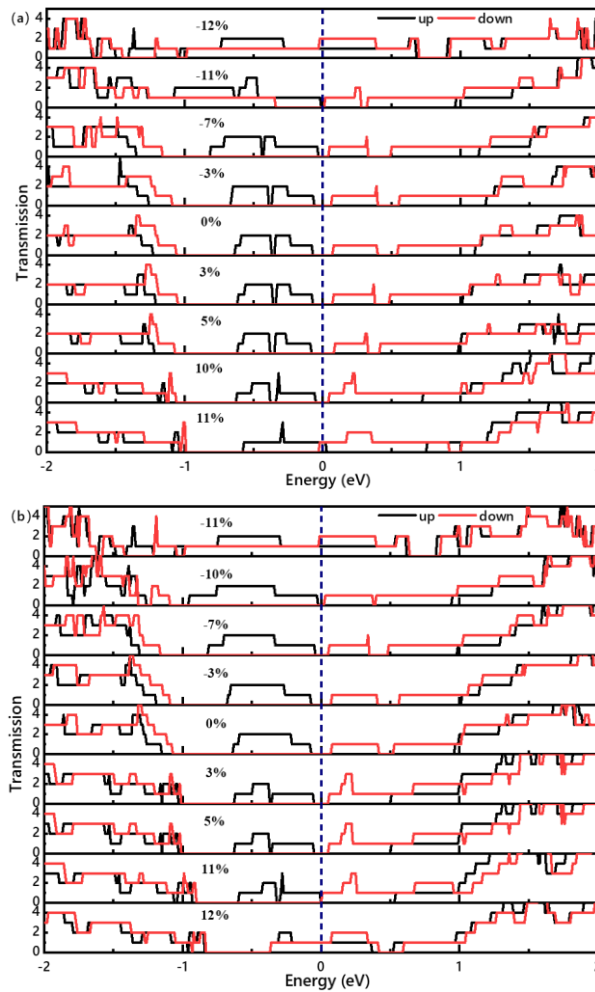**Figure S4.** (a)-(b) Spin-dependent transmission spectra of PC<sub>3</sub>NRs with widths of 7 and 9 under uniaxial strain, respectively. Black/red solid lines indicate spin up/down.

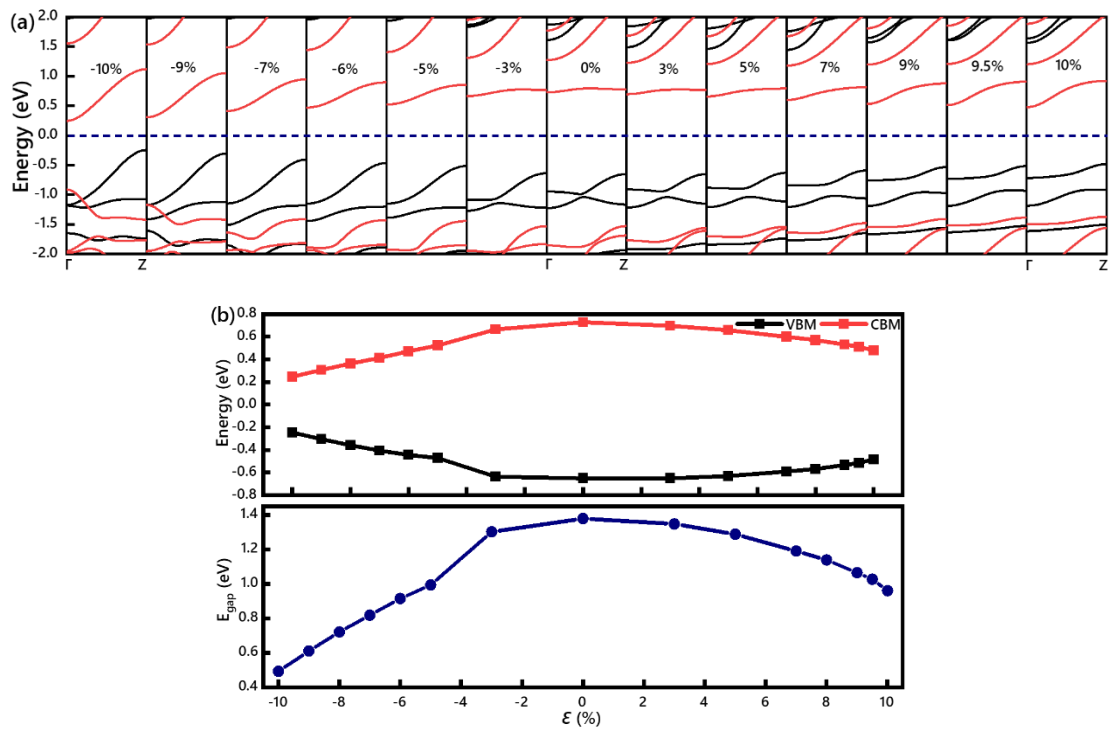

**Figure S5.** (a) Band structure of PC<sub>3</sub>NR under different uniaxial strains calculated using HSE. The black/red solid lines indicate the up/down spin. (b) CBM, VBM and bandgap variation trends under uniaxial strain.
